# Supplementary material for: A photosensitive-type CPL response controlled by intermolecular dynamic FRET and chiral transfer in ternary chiral emissive nematic liquid crystals
Source: Royal Society of Chemistry journal article supplement (doi:10.1039/d1tc03277a), 2021-01-01
Supplement: d1tc03277a1.pdf [file d1tc03277a1.pdf]

## Supporting Information

### **Photosensitive-type CPL Response Controlled by Intermolecular Dynamic FRET and Chiral Transfer in Ternary Chiral Emissive Nematic Liquid Crystals**

Kun Yao,<sup>a, b</sup> Yang Li,<sup>a, b</sup> Yihao Shen,<sup>b</sup> Yiwu Quan,<sup>\*b</sup> Yixiang Cheng,<sup>\*a</sup>

<sup>a</sup> Jiangsu Key Laboratory of Advanced Organic Materials, School of Chemistry and Chemical Engineering, Nanjing University, Nanjing 210023, China.

E-mail: yxcheng@nju.edu.cn

<sup>b</sup> Key Laboratory of High Performance Polymer Materials & Technology of Ministry of Education, School of Chemistry and Chemical Engineering, Nanjing University, Nanjing 210023, China.

E-mail: quanyiwu@nju.edu.cn

**Materials:** All chemicals and reagents were purchased from Aladdin, Alfa Aesar and used as received without further purification. Nematic liquid crystal E7 ( $n_e = 1.741$ ,  $n_o = 1.517$ , at 589 nm;  $T_m = -40^\circ\text{C}$ ,  $T_i = 59^\circ\text{C}$ ) and was purchased from Suzhou King Optonics Co. Ltd. The LC cells were purchased from Suzhou King Optonics CO. Ltd.

**Characterizations:** The  $^1\text{H}$  NMR (400 MHz) and  $^{13}\text{C}$  NMR (100 MHz) spectra were recorded on a 400 MHz Bruker AVANCE III-400 spectrometer by using  $\text{CDCl}_3$  as solvent and the TMS as internal standard. Fluorescence (FL) spectra were measured by using a HORIBA Scientific Fluoromax-4 Spectrofluorometer. The UV-visible (UV-vis) absorption spectra were recorded Hitachi U-3900 spectrophotometer. Circular dichroism (CD) spectra and circularly polarized luminescence (CPL) spectra were recorded by using JASCO J-810 spectropolarimeter and JASCO CPL-300 spectrofluoropolarimeter in quartzose cells (the thickness of the LC cell is 15  $\mu\text{m}$ ), respectively. Fluorescence lifetime measurements were recorded on Edinburg FLS-980 fluorescence spectrometer.

## Synthesis of the *R/S*-BF.

Intermediate *R/S*-1 were prepared as our previously described.<sup>S1</sup>

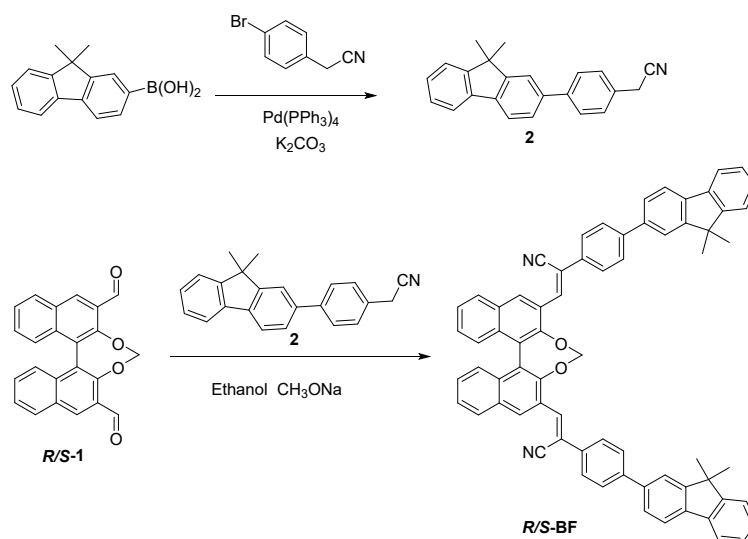

**Scheme S1.** The synthesis procedures of *R/S*-BF enantiomers.

**Compound 2:** Intermediate **2** was synthesized from (9,9-Dimethyl-9H-fluoren-2-yl)boronic acid (2.00 g, 8.39 mmol), 4-Bromophenylacetonitrile (1.97 g, 10.08 mmol),  $\text{Pd}(\text{PPh}_3)_4$  (0.18 g, 0.16 mmol) and  $\text{K}_2\text{CO}_3$  (1.74 g, 12.56 mmol) in a mixture solvent of 30 mL 1,4-Dioxane and 10 ml  $\text{H}_2\text{O}$  at 85 °C under  $\text{N}_2$  atmosphere for 12 h. After the reaction was finished, the mixture was poured into water and extracted with  $\text{CH}_2\text{Cl}_2$  (30 ml  $\times$  3). The organic layer was dried with anhydrous sodium sulfate and filtrated. Then evaporated under reduced pressure. The crude product was purified with silica gel colum chromatography (eluent: petroleum ether/ethyl acetate, v/v, 4:1) to give 2.08 g of **2** (yellow solid in 80 % yeild)  $^1\text{H}$  NMR (400 MHz,  $\text{CDCl}_3$ )  $\delta$  7.80-7.78 (d,  $J$  = 8 Hz, 1H), 7.76-7.74 (dd,  $J$  = 8 Hz, 1H), 7.69-7.66 (d,  $J$  = 12 Hz, 2H), 7.63 (s, 1H), 7.57-7.55 (dd,  $J$  = 8 Hz, 1H), 7.47-7.41 (m, 3H), 7.36-7.33 (m, 2H), 3.82 (s, 2H), 1.54 (s, 6H).  $^{13}\text{C}$  NMR (100 MHz,  $\text{CDCl}_3$ )  $\delta$  154.37, 153.87, 141.54, 139.31, 138.90, 138.68, 128.65,

128.37, 127.89, 127.42, 127.08, 126.14, 122.64, 121.32, 120.37, 120.15, 46.99, 27.23, 23.37.

**Compound *R/S*-BF:** Compound **2** (0.30 g, 0.97 mmol) and ***R/S*-1** (0.17 g, 0.49 mmol) were dissolved in 20 mL ethanol and CH<sub>3</sub>ONa (0.052 g, 0.97 mmol) were added, respectively. Then stirred at room temperature for 3 h. After the reaction was finished, the product was purified by recrystallization from ethanol to give compound ***R/S*-BF** as a yellow solid (0.28 g) in 62% yield. <sup>1</sup>H NMR (400 MHz, CDCl<sub>3</sub>) δ 8.98 (s, 2H), 8.14-8.11 (t, *J* = 12 Hz, 4H), 7.88-7.86 (d, *J* = 8Hz, 4H), 7.82-7.76 (m, 8H), 7.69 (s, 2H), 7.64-7.62 (d, *J* = 8 Hz, 2H), 7.57-7.53 (t, *J* = 16 Hz, 2H), 7.48-7.45 (m, 4H), 7.42-7.38 (t, *J* = 16 Hz, 2H), 7.37-7.33 (m, 4H), 5.73 (s, 2H), 1.55 (s, 12H). <sup>13</sup>C NMR (100 MHz, CDCl<sub>3</sub>) δ 154.66, 153.91, 148.87, 142.86, 139.21, 138.95, 138.61, 135.37, 133.10, 132.86, 131.24, 129.76, 129.60, 127.82, 127.54, 127.11, 126.70, 126.14, 126.09, 122.67, 121.29, 120.47, 120.21, 113.66, 47.01, 27.23.

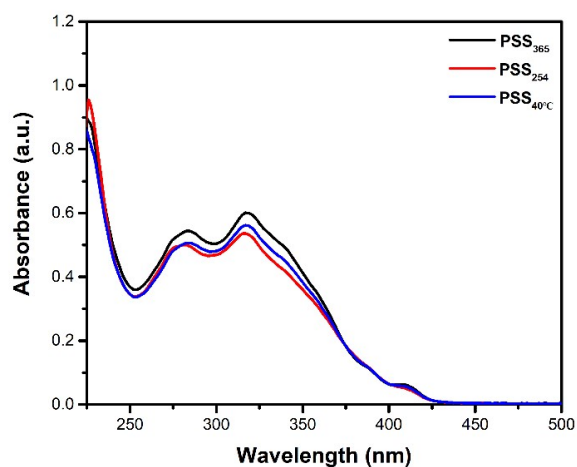

**Fig. S1.** UV-*vis* absorption spectra of *S*-BF in THF solution ( $1.0 \times 10^{-5}$  mol L<sup>-1</sup>) with different states.

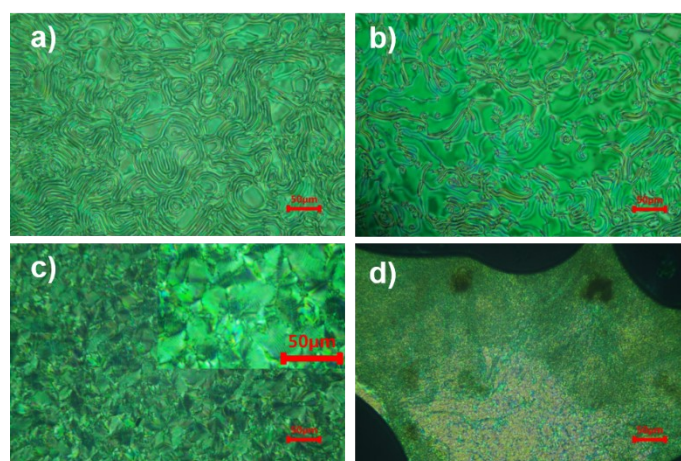

**Fig. S2.** POM images of a) 0.25 wt% *S*-BF in E7 LCs before 365 nm UV irradiation at 25 °C. b) 0.25 wt% *S*-BF in E7 LCs after 365 nm UV irradiation at 25 °C. c) 1.0 wt% *S*-BF in E7 LCs before 365 nm UV irradiation at 25 °C. d) 1.0 wt% *S*-BF in E7 LCs after 365 nm UV irradiation at 25 °C.

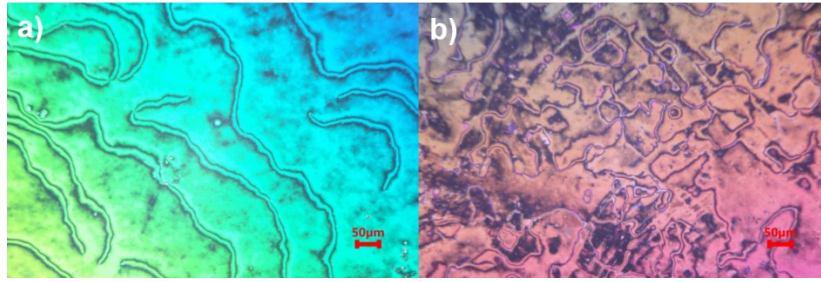

**Fig. S3.** POM images of a) 0.5 wt% NR in E7 LCs. b) 1.0 wt% NR in E7 LCs.

The energy transfer efficiencies can be assessed from steady-state fluorescence spectrums by using the **Equation S1** as shown in Figure S4. The  $F_D$  and  $F_{DA}$  are defined the maximum fluorescence intensity of Donor in the absence and presence of acceptor, respectively.<sup>S2</sup>

$$E = 1 - \frac{F_D}{F_{DA}} \quad \text{(Equation S1)}$$

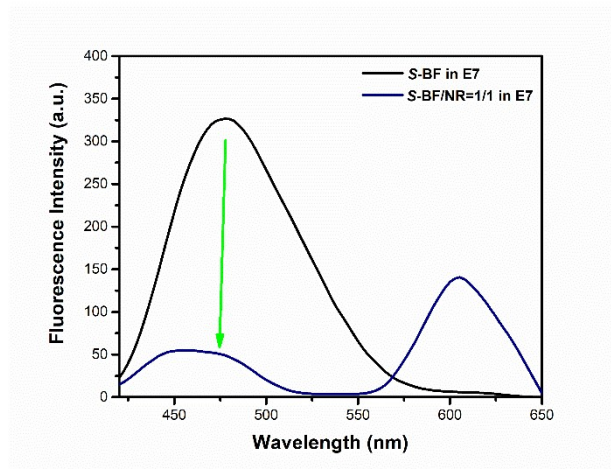

**Fig. S4.** The energy transfer efficiency (83%) of Z-S-T-N\*-LCs in the cases of 1/1 ratio of NR/S-BF ( $\lambda_{ex}$ = 370 nm).

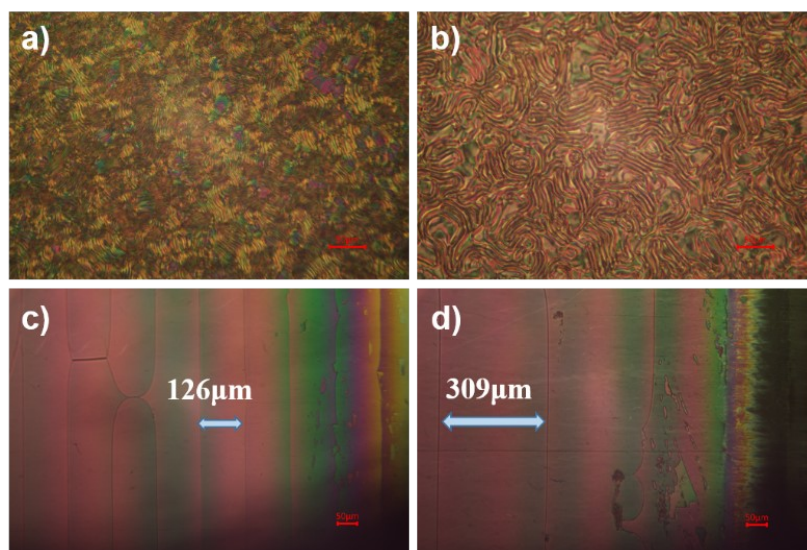

**Fig. S5.** a) POM images of *S-T-N\**-LCs before 365 nm UV irradiation at 25 °C. b) POM images of *S-T-N\**-LCs after 365 nm UV irradiation at 25 °C. c) The Grandjean-Cano lines of *S-T-N\**-LCs before 365 nm UV irradiation at 25 °C. d) The Grandjean-Cano lines of *S-T-N\**-LCs after 365 nm UV irradiation at 25 °C.







## References

[S1] X. Li, Y. Shen, K. Liu, Y. Quan and Y. Cheng, *Mater. Chem. Front.*, 2020, **4**, 2954-2961.

[S2] S. Lin, H. Sun, J. Qiao, X. Ding and J. Guo, *Adv. Optical Mater.*, 2020, **8**, 2000107.
